# Supplementary material for: Estimation of ALU Repetitive Element in Plasma as a Cost-Effective Liquid Biopsy Tool for Disease Prognosis in Breast Cancer
Source: Preprints.org preprint supplement (doi:10.20944/preprints202212.0400.v1), 2022-12-21

**Supplementary figures**

**Figure 1:** Proportion percentage of various disease groups subjected to cfDNA analysis in the study.


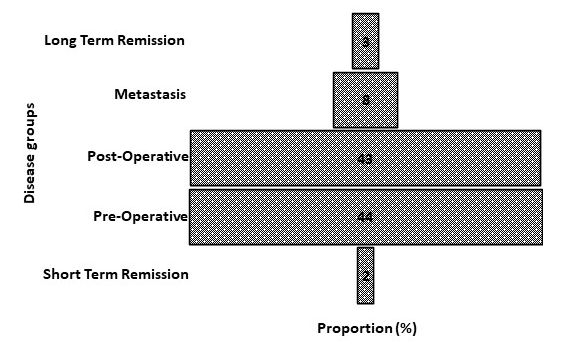


**Figure 2:** Univariate analysis depicting DNA integrity ratio between the IHC subtypes


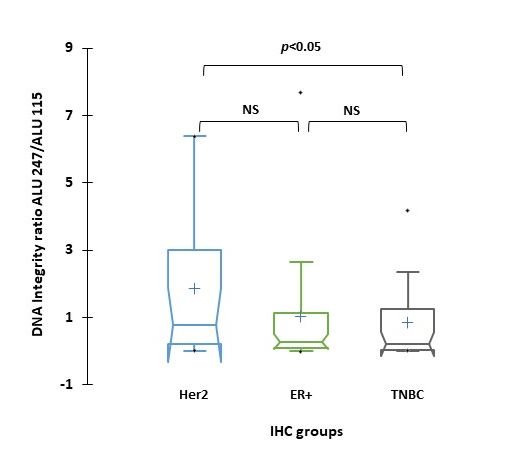


**Figure 3:** Univariate analysis depicting DNA integrity ratio between high and mild immune infiltrate groups in the ER-negative subtype


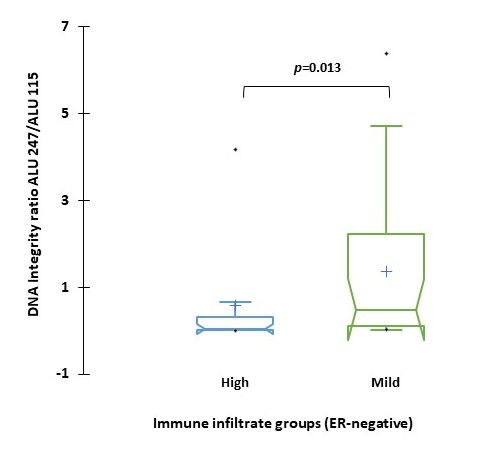


**Figure 4:** Lasso regression model analysis performed with ALU 247 and other clinical parameters. The graph represents the weightage the lasso model has assigned to the parameters in determining metastasis or death due to metastasis. Post-Op ALU 247 has the highest weightage.


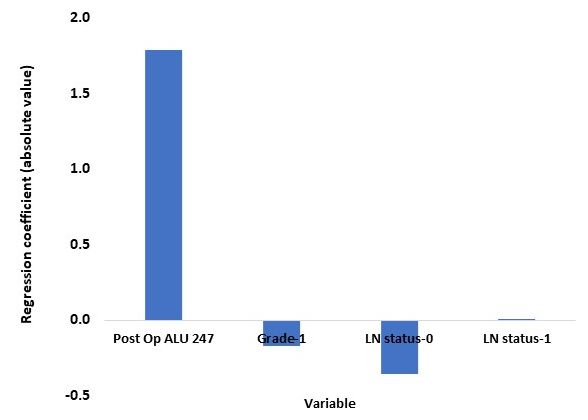

Supplement: Supplementary file 1 [file supplementary]
